# Supplementary material for: Tuning atomically precise metal nanocluster mediated photoelectrocatalysis via a non-conjugated polymer
Source: Royal Society of Chemistry journal article supplement (doi:10.1039/d1ta10284b), 2022-01-01
Supplement: d1ta10284b1.pdf [file d1ta10284b1.pdf]

## Supporting Information

# Tuning Atomically Precise Metal Nanoclusters Mediated Photoelectrocatalysis via Non-Conjugated Polymer

Bo Tang, Shi-Cheng Zhu, Hao Liang, Shen Li, Bi-Jian Liu, Fang-Xing Xiao\*

College of Materials Science and Engineering, Fuzhou University, New Campus, Minhou, Fujian Province,  
350108, China.

E-mail: [fxxiao@fzu.edu.cn](mailto:fxxiao@fzu.edu.cn)

# Table of Contents

|                                                                                                                                                                                                 | Page NO. |
|-------------------------------------------------------------------------------------------------------------------------------------------------------------------------------------------------|----------|
| <b>Experimental Section</b> .....                                                                                                                                                               | S2       |
| <b>Fig. S1.</b> Zeta potentials of TNRAs, TNRAs/PDDA and Ag <sub>x</sub> @GSH NCs .....                                                                                                         | S4       |
| <b>Fig. S2.</b> Molecular structure of PDDA .....                                                                                                                                               | S5       |
| <b>Fig. S3.</b> Molecular structure of GSH .....                                                                                                                                                | S5       |
| <b>Fig. S4.</b> UV-vis absorption spectrum of PDDA solution .....                                                                                                                               | S6       |
| <b>Fig. S5.</b> XPS results of TNRAs and T(PA) <sub>4</sub> .....                                                                                                                               | S7       |
| <b>Fig. S6.</b> FESEM images TNRAs with corresponding EDS and elemental mapping results.....                                                                                                    | S8       |
| <b>Fig. S7.</b> FESEM images T(PA) <sub>4</sub> with corresponding EDS and elemental mapping results .....                                                                                      | S9       |
| <b>Fig. S8.</b> FESEM images TA <sub>4</sub> with corresponding EDS and elemental mapping results .....                                                                                         | S10      |
| <b>Fig. S9.</b> LSV curves and I-t results of T(PA) <sub>n</sub> with different number of layers.....                                                                                           | S11      |
| <b>Fig. S10.</b> Characterization of Ag <sub>9</sub> (SG) <sub>6</sub> NCs.....                                                                                                                 | S12      |
| <b>Fig. S11.</b> Characterization of Ag <sub>16</sub> (SG) <sub>9</sub> NCs .....                                                                                                               | S13      |
| <b>Fig. S12.</b> Characterization of Ag <sub>31</sub> (SG) <sub>19</sub> NCs .....                                                                                                              | S14      |
| <b>Fig. S13.</b> Photostability of T(PA) <sub>4</sub> with/without different scavengers in Na <sub>2</sub> SO <sub>4</sub> aqueous solution .....                                               | S15      |
| <b>Fig. S14.</b> I-t results of T(PA) <sub>4</sub> after dipping in Na <sub>2</sub> SO <sub>4</sub> aqueous solution .....                                                                      | S16      |
| <b>Fig. S15.</b> Energy band characterization of TNRAs substrate .....                                                                                                                          | S17      |
| <b>Table S1.</b> Peak positions with corresponding functional groups of four samples .....                                                                                                      | S18      |
| <b>Table S2.</b> Chemical bond species for four samples .....                                                                                                                                   | S19      |
| <b>Table S3.</b> R <sub>ct</sub> values of different photoanodes under visible light irradiation.....                                                                                           | S20      |
| <b>Table S4.</b> HOMO, LUMO level and bandgap of Ag <sub>x</sub> @GSH, Ag <sub>9</sub> (SG) <sub>6</sub> , Ag <sub>16</sub> (SG) <sub>9</sub> and Ag <sub>31</sub> (SG) <sub>19</sub> NCs...S21 | S21      |
| <b>Reference</b> .....                                                                                                                                                                          | S22      |

## Experimental Section

### 1. Materials

Fluorine-doped tin oxide glass (FTO, 50 mm × 10 mm × 20 mm, 99.9%), deionized water (DI H<sub>2</sub>O, Millipore, 18.2 MΩ·cm resistivity), titanium butoxide (C<sub>16</sub>H<sub>36</sub>O<sub>4</sub>Ti), hydrochloric acid (HCl), silver nitrate (AgNO<sub>3</sub>), L-glutathione (GSH), ammonium oxalate ((NH<sub>4</sub>)<sub>2</sub>C<sub>2</sub>O<sub>4</sub>), sodium chloride (NaCl), sodium borohydride (NaBH<sub>4</sub>), sodium hydroxide (NaOH), hydrogen peroxide (H<sub>2</sub>O<sub>2</sub>), L-glutathione (GSH) and poly(diallyl-dimethyl-ammonium chloride) solution (PDDA, average Mw 200.000-350.000) were obtained from Sigma-Aldrich. All the materials above were used directly without further purification.

### 2. Preparation of TiO<sub>2</sub> nanorod arrays (TNRAs)

Firstly, 15ml ultrapure water and 15ml concentrated hydrochloric acid (36.5%-38% by weight) were poured into 50ml inner lining and stirred at 1000r/min for 5 min. Then 0.45ml titanium butoxide as titanium source was added into the reactor and stirred for 15 min. The cleaned FTO substrate is added to the substrate, and the conductive surface is placed downward, just completely immersed in the solution. The inner lining was put into the reactor and heated in an electric oven at 150 °C for 12 h. The FTO substrate was taken out, cleaned with deionized water and dried with N<sub>2</sub>, then heated to 500 °C in muffle furnace and kept for 1 h.

### 3. Preparation of Ag<sub>x</sub>@GSH NCs

Firstly, 12.5 mL of 20 mM AgNO<sub>3</sub> and 7.5 mL of 50 mM reduced-glutathione (GSH) were added to a 500 mL flask containing 200 mL of ultrapure water. Stirring the white precipitates for 2 min, and then changing the pH of the reaction mixture to 11 by adding a 1 M NaOH solution. Subsequently, heating this solution at 90 °C for 1 h under stirring at 500 rpm. After the solution was naturally cooled to room temperature, the pH was changed again to 3.75 by adding 1 M HCl. Finally, the NC solution was aged for 24 h at room temperature, and all precipitates appeared during this period were removed via centrifugation.

### 4. Preparation of GSH-capped Ag<sub>9</sub>(SG)<sub>6</sub>, Ag<sub>16</sub>(SG)<sub>9</sub> and Ag<sub>31</sub>(SG)<sub>19</sub> NCs

Ag<sub>9</sub>(SG)<sub>6</sub>, Ag<sub>16</sub>(SG)<sub>9</sub> NCs were prepared by referring to the previous work of Xun.<sup>S1</sup> Ag<sub>31</sub>(SG)<sub>19</sub> NCs were prepared by referring to the previous work of Franck.<sup>S2</sup>

#### (1) Preparation of Ag<sub>9</sub>(SG)<sub>6</sub> and Ag<sub>16</sub>(SG)<sub>9</sub> NCs

Aqueous solutions of AgNO<sub>3</sub> (20 mM) and GSH (50 mM) were prepared with ultrapure water. An aqueous solution of NaBH<sub>4</sub> (112 mM) was freshly prepared by dissolving 43 mg of NaBH<sub>4</sub> in 2 ml of 1 M

NaOH solution, followed by the addition of 8 ml of ultrapure water. The addition of a certain amount of NaOH to the NaBH<sub>4</sub> solution was used to improve the stability of borohydride ions against hydrolysis. In a typical experiment to synthesize Ag<sub>9</sub>(SG)<sub>6</sub> and Ag<sub>16</sub>(SG)<sub>9</sub> NCs, aqueous solutions of AgNO<sub>3</sub> (125 μl, 20 mM) and GSH (150 μl, 50 mM) were first mixed in water (4.85 ml) under vigorous stirring to form thiolate-Ag complexes, followed by the addition of an aqueous solution of NaBH<sub>4</sub> (50 μl, 112 mM). A deep-red solution of Ag NCs (~5ml) was collected after 5 min. This Ag NC solution was then incubated at room temperature for 3h, and the deep-red solution gradually decomposed into a colorless solution, leading to the formation of thiolate-Ag complexes. Subsequently, a certain amount of 112 mM NaBH<sub>4</sub> (50 μl for the synthesis of Ag<sub>16</sub>(SG)<sub>9</sub> or 250 μl for Ag<sub>9</sub>(SG)<sub>6</sub> NCs) was introduced into this colorless solution under vigorous stirring, leading to the formation of a light-brown Ag NC solution after 15 min. Without stirring, this light-brown Ag NC solution was incubated at room temperature for a certain period of time (8 h for Ag<sub>16</sub>(SG)<sub>9</sub> and 48 h for Ag<sub>9</sub>(SG)<sub>6</sub>). A strong red or green emission was then observed in the aqueous phase. The Ag<sub>16</sub>(SG)<sub>9</sub> or Ag<sub>9</sub>(SG)<sub>6</sub> NCs were collected without purification and stored at 4 °C for further characterization.

## *(2) Preparation of Ag<sub>31</sub>(SG)<sub>19</sub> NCs*

To an ice-cold solution of glutathione (200 mg GSH in 35 ml of H<sub>2</sub>O) was added drop by drop 1 ml of AgNO<sub>3</sub> solution (55 mg ml<sup>-1</sup>). A white precipitate appeared that was dispersed by adding 0.8 ml of 1 M NaOH solution (final pH≈6-7). Then 36 mg of NaBH<sub>4</sub> in 1 ml of ice-cold water was quickly added and the solution was left under strong agitation. After 1 h 30 min, 0.3 ml of H<sub>2</sub>O<sub>2</sub> (33%) was added to the dark brown solution. 30 min later, additional amounts of AgNO<sub>3</sub> (0.14 ml at 100 mg ml<sup>-1</sup>) and GSH (50 mg per powder) were added and after 5 min, 0.5 ml of an ice-cold solution of NaBH<sub>4</sub> (20 mg ml<sup>-1</sup>) was added. The reaction mixture was kept stirring vigorously for 1 h 30 min.

## **5. Preparation of TNRAs/(Ag<sub>x</sub>@GSH NCs)<sub>4</sub> and TNRAs/(PDDA)<sub>4</sub> photoanodes**

TNRAs substrate was first dipped into a Ag<sub>x</sub>@GSH NCs aqueous solution (0.19 mg/ml, pH=3.75) for 5 min, and then washed with deionized water (DI H<sub>2</sub>O). We define the above preparation process as TNRAs/(Ag<sub>x</sub>@GSH)<sub>1</sub>. TNRAs were first dipped into a PDDA aqueous solution (0.5 mg/mL, 0.5 M NaCl, pH=10) for 5 min, and then washed with deionized water (DI H<sub>2</sub>O). We define the above preparation process as TNRAs/(PDDA)<sub>1</sub>. We can repeat the above synthesis steps to prepare multilayer TNRAs/(Ag<sub>x</sub>@GSH NCs)<sub>4</sub> and TNRAs/(PDDA)<sub>4</sub> photoanodes.

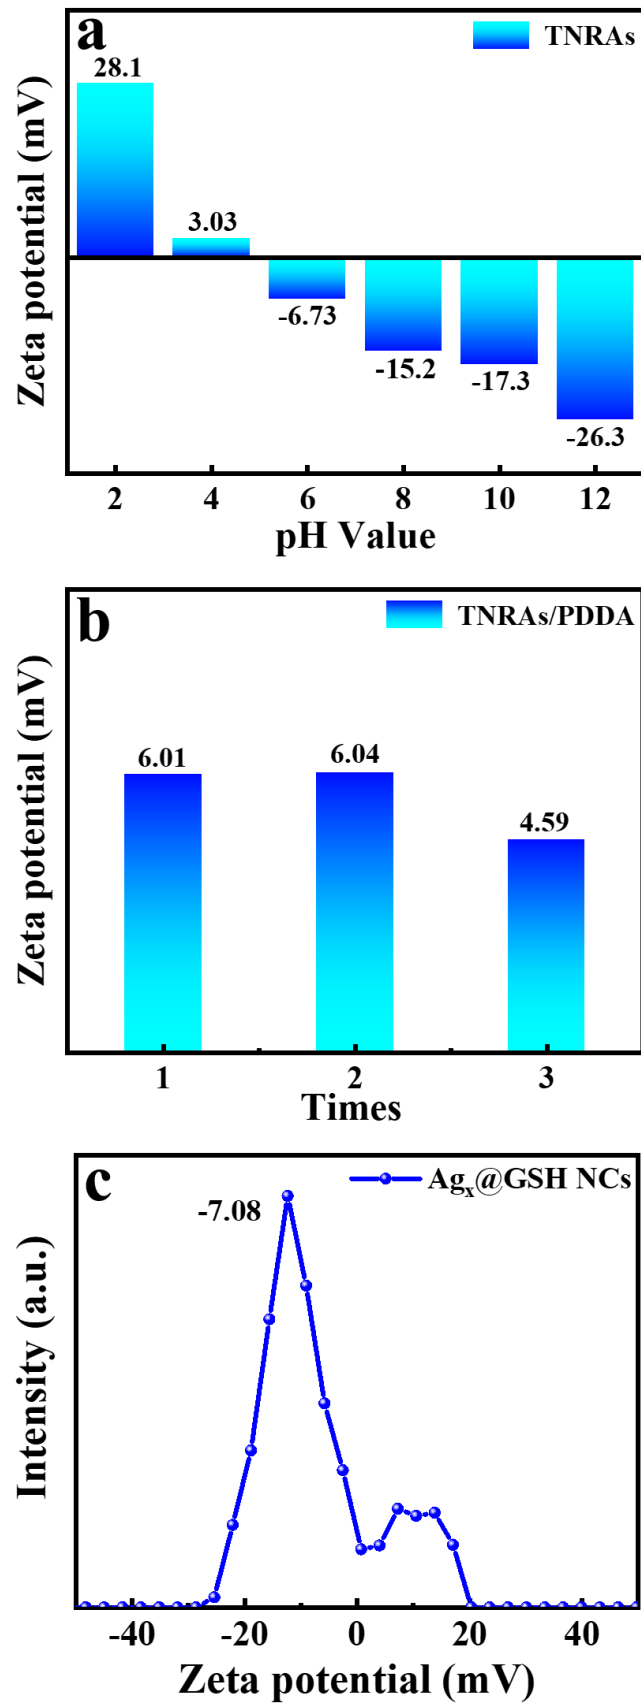

Fig. S1. Zeta potentials of (a) TNRAs, (b) TNRAs/PDDA and (c) Ag<sub>x</sub>@GSH NCs.

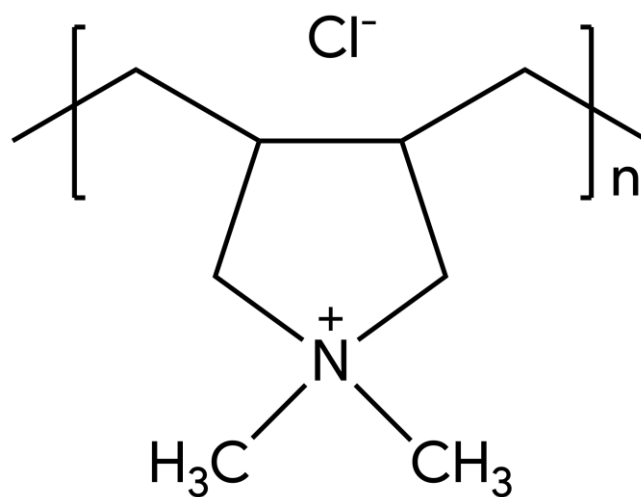

Fig. S2. Molecular structure of PDDA.

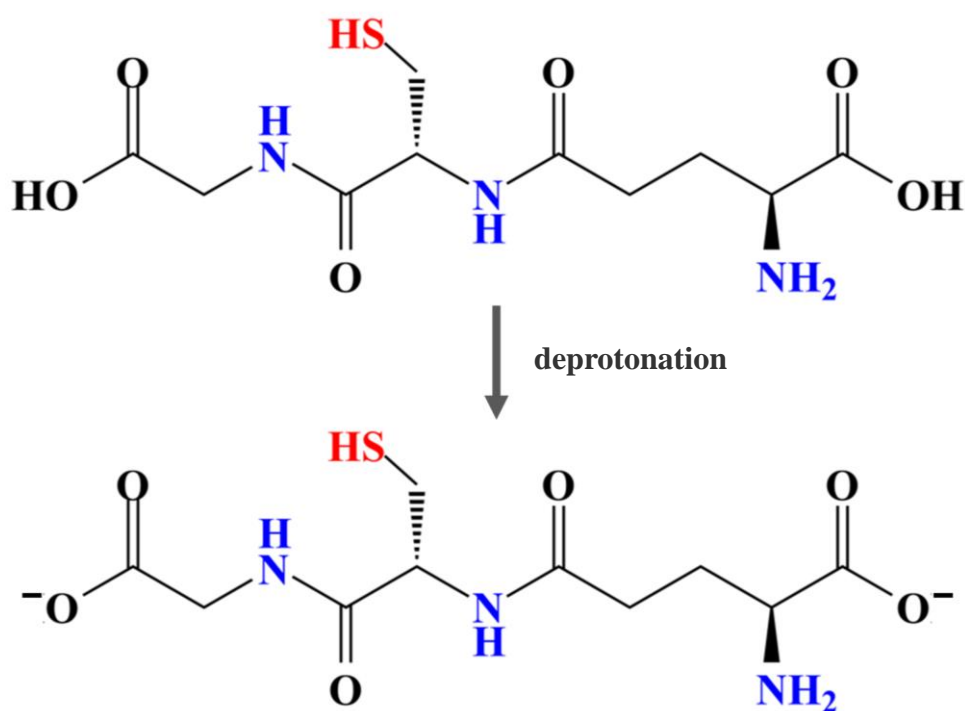

Fig. S3. Molecular structure of GSH ligand along with deprotonation process.

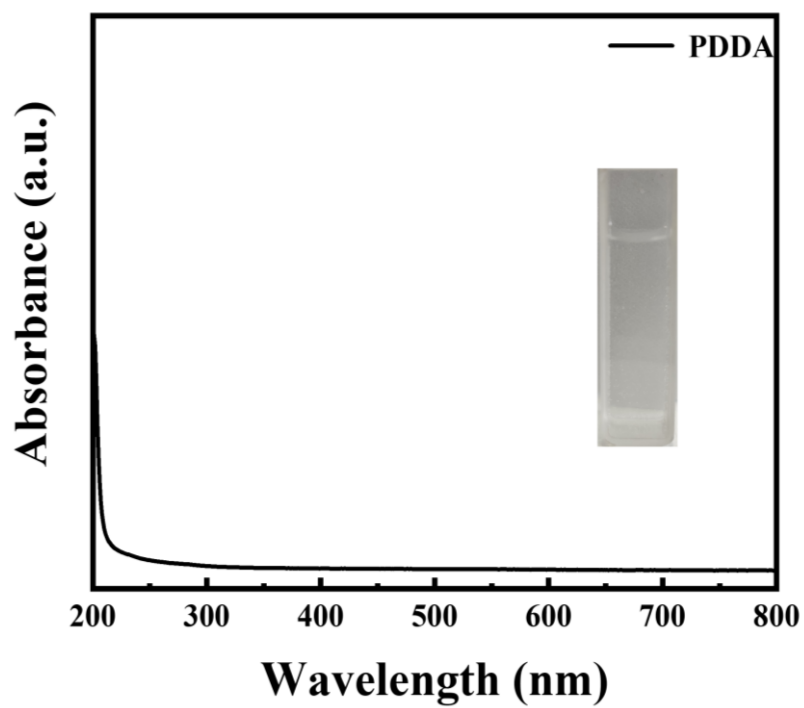

**Fig. S4.** UV-vis absorption spectrum of PDDA aqueous solution.

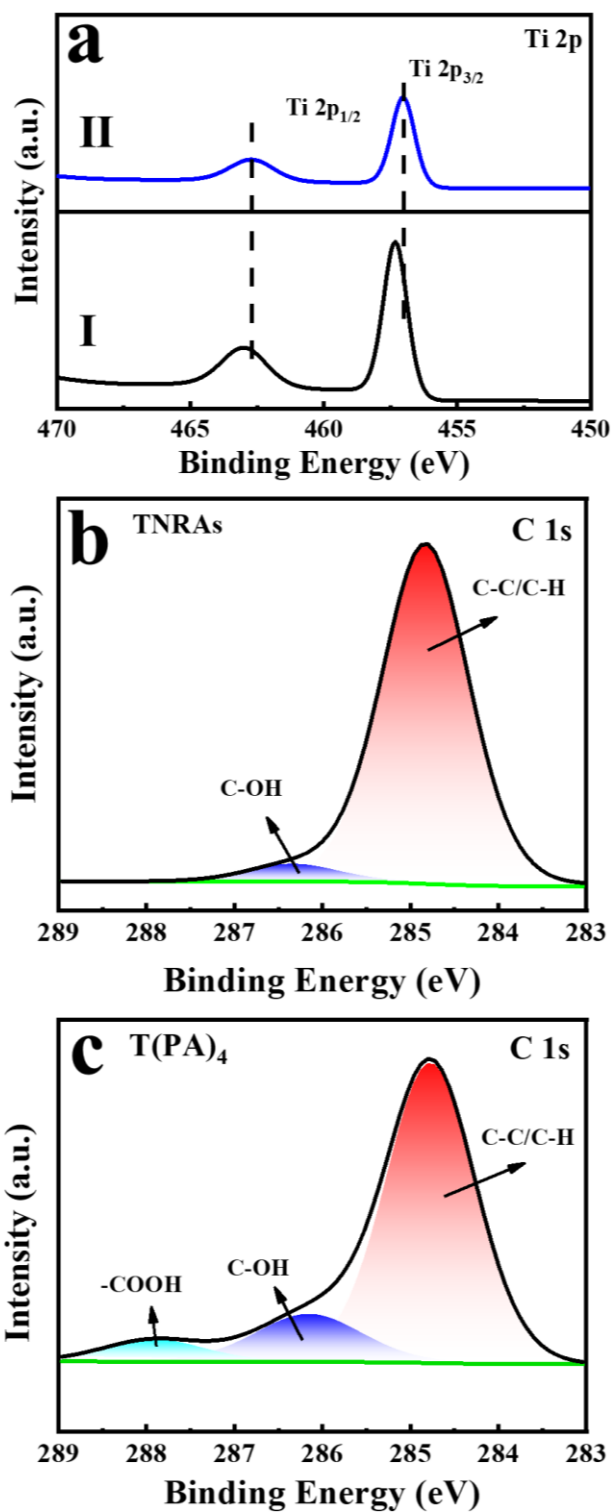

**Fig. S5.** High-resolution (a) Ti 2d of (I) TNRAs and (II) T(PA)<sub>4</sub>, and C 1s spectra of (b) TNRAs and (c) T(PA)<sub>4</sub>.



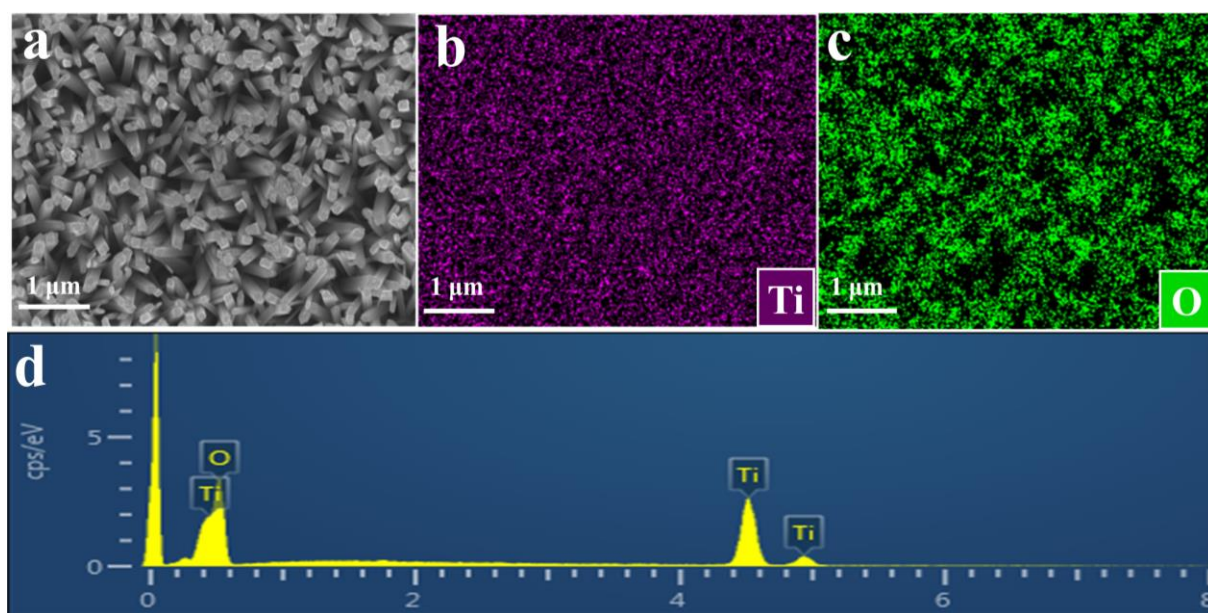

**Fig. S6.** (a) Top-view FESEM image of TNRAs with (b & c) elemental mapping and (d) EDS results.

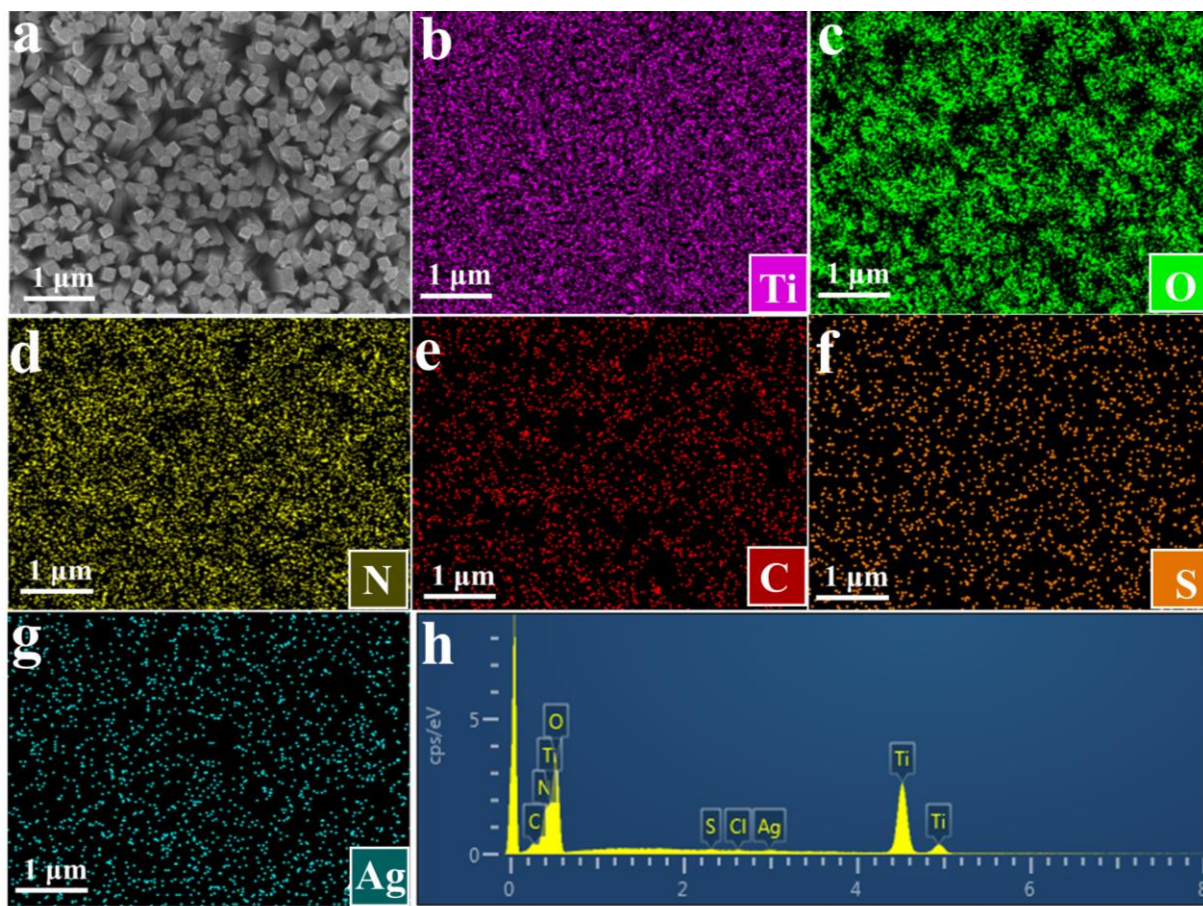

**Fig. S7.** (a) Top-view FESEM image of T(PA)<sub>4</sub> with (b-g) elemental mapping and (h) EDS results.

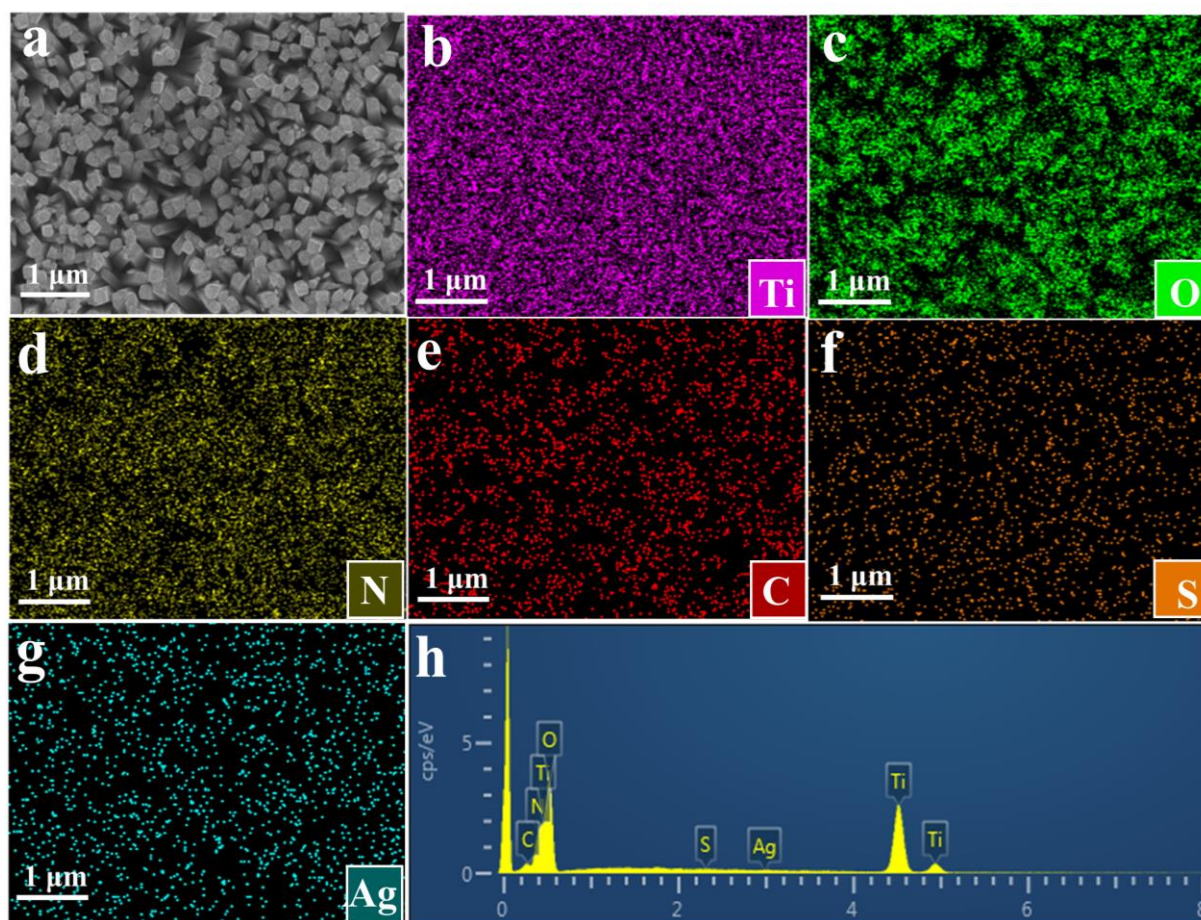

**Fig. S8.** (a) Top-view FESEM image of TA<sub>4</sub> with (b-g) elemental mapping and (h) EDS results.



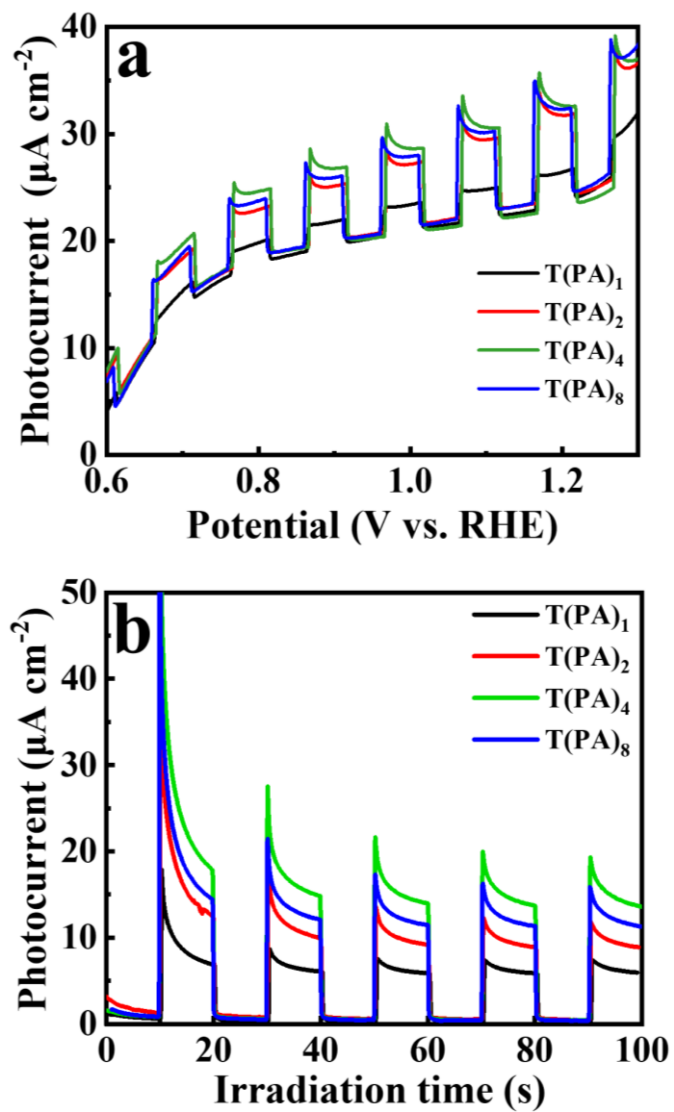

**Fig. S9.** (a) LSV curves and (b) transient photocurrent responses of T(PA)<sub>1</sub>, T(PA)<sub>2</sub>, T(PA)<sub>4</sub>, and T(PA)<sub>8</sub>.

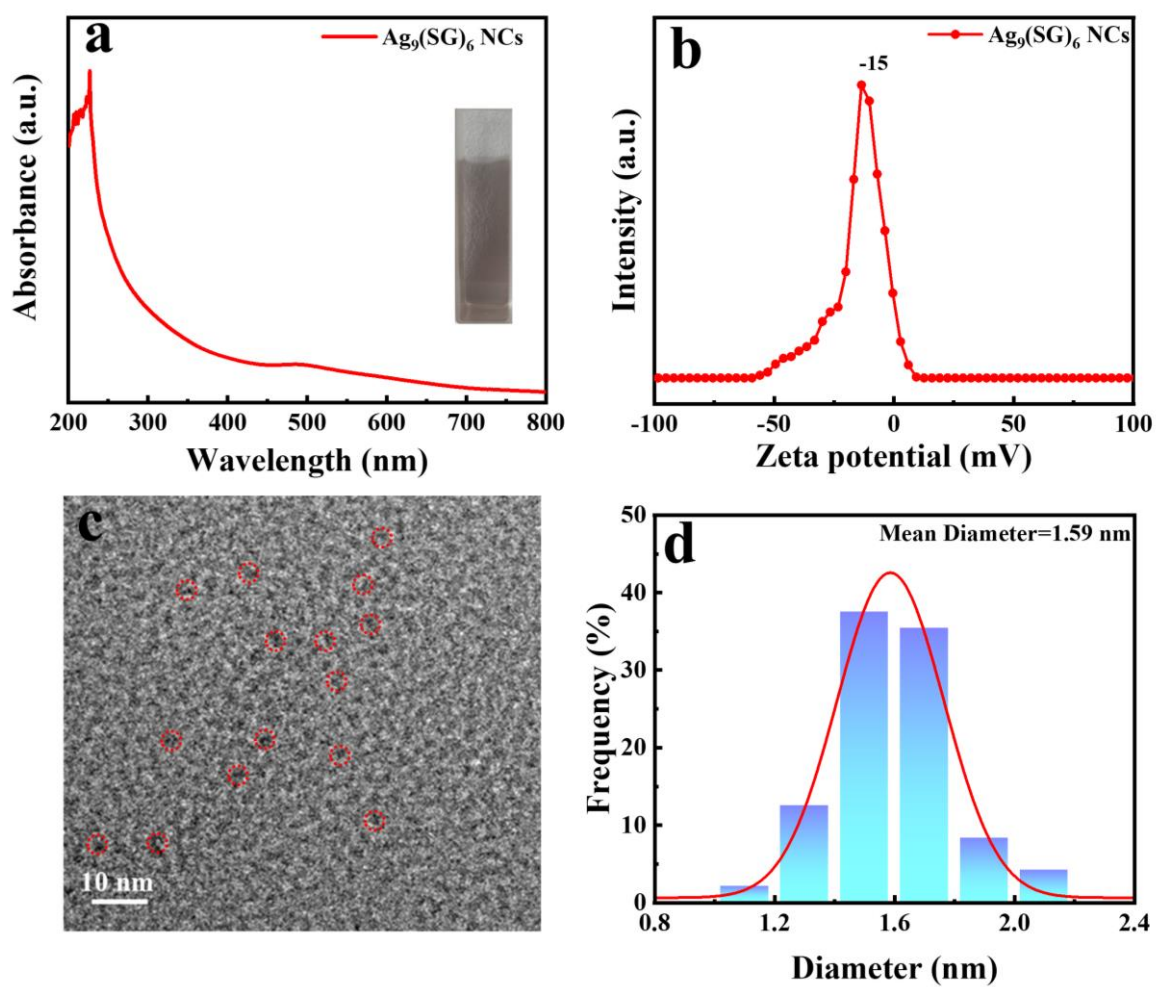

**Fig. S10.** (a) UV-vis absorption spectrum, (b) Zeta potential, (c) TEM image and (d) size distribution histogram of  $\text{Ag}_9(\text{SG})_6$  NCs.

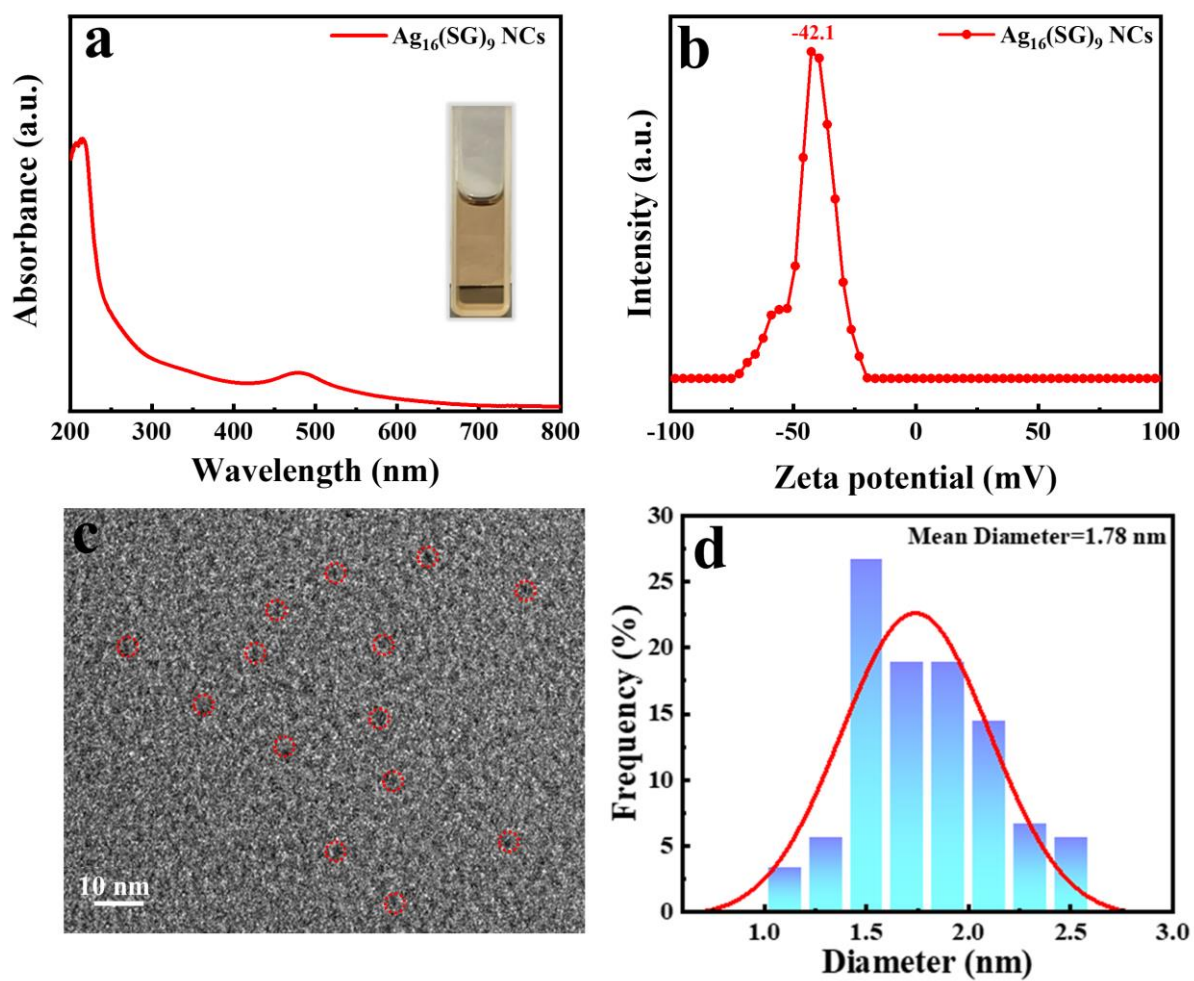

**Fig. S11.** (a) UV-vis absorption spectrum, (b) Zeta potential, (c) TEM image, and (d) size distribution histogram of  $\text{Ag}_{16}(\text{SG})_9$  NCs.

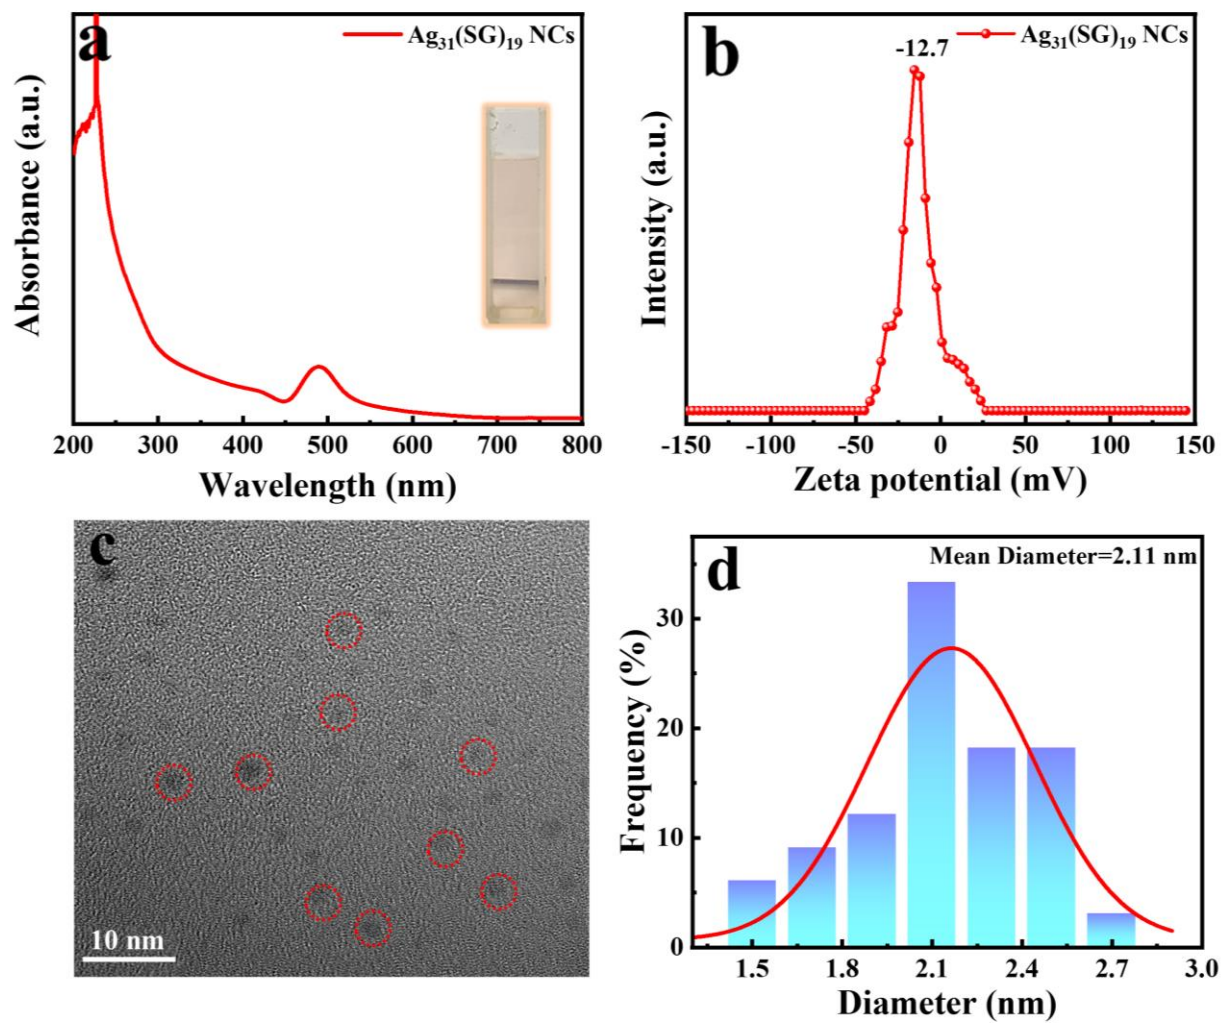

**Fig. S12.** (a) UV-vis absorption spectrum, (b) Zeta potential, (c) TEM image and (d) size distribution histogram of  $\text{Ag}_{31}(\text{SG})_{19}$  NCs.

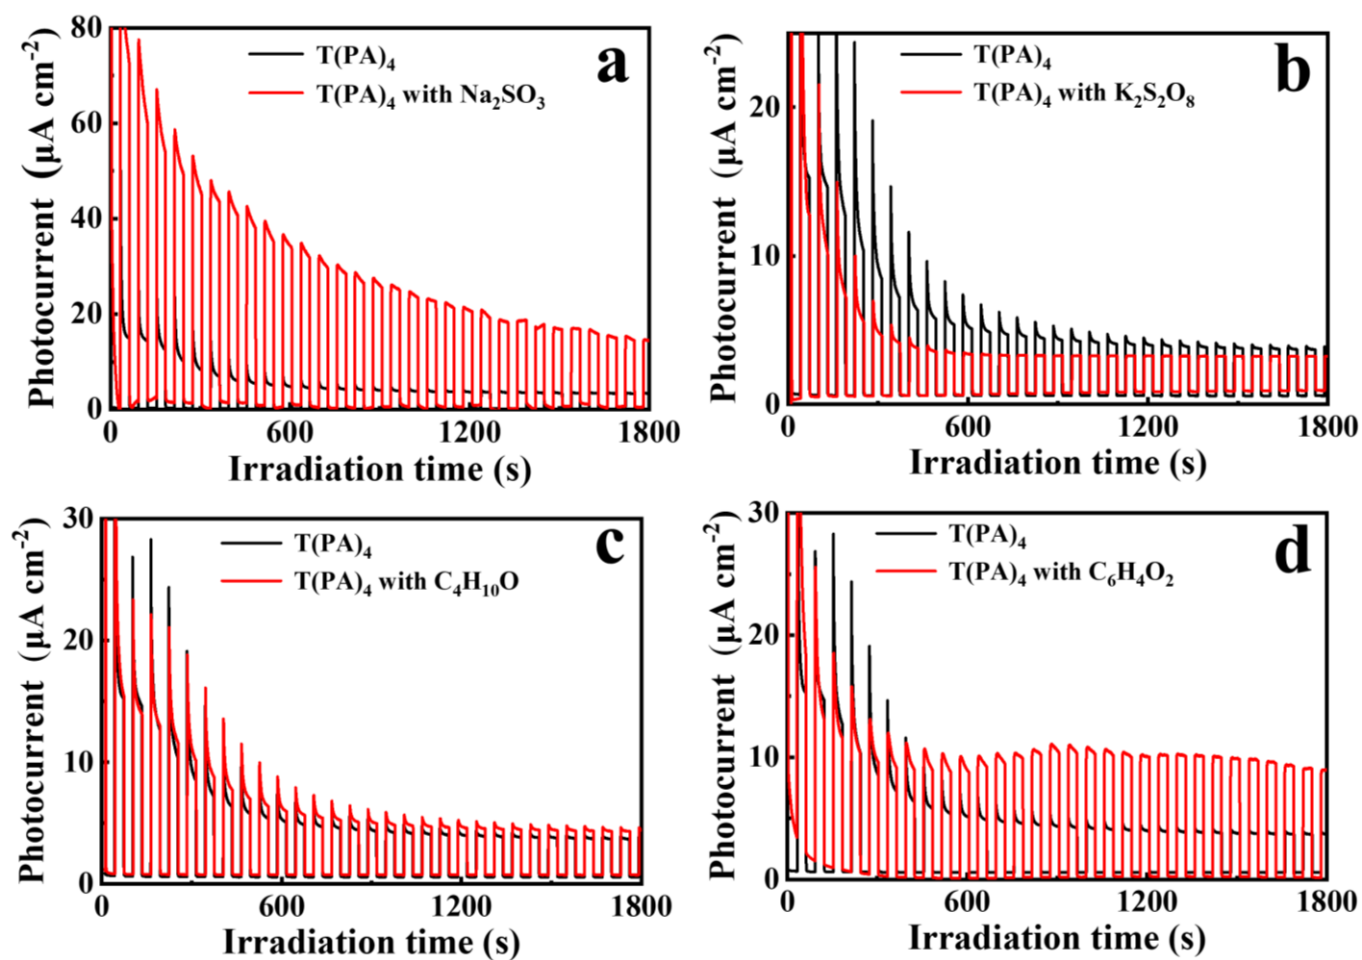

**Fig. S13.** Transient photocurrent responses of T(PA)<sub>4</sub> in Na<sub>2</sub>SO<sub>4</sub> aqueous solution with adding (a) Na<sub>2</sub>SO<sub>3</sub> (50 mM), (b) K<sub>2</sub>S<sub>2</sub>O<sub>8</sub> (50 mM), (c) C<sub>4</sub>H<sub>10</sub>O (50 mM), and (d) C<sub>6</sub>H<sub>4</sub>O<sub>2</sub> (50 mM) under continuous visible light irradiation ( $\lambda > 420$  nm) for 0.5 h (pH=7, bias: 1.0 V vs. RHE).



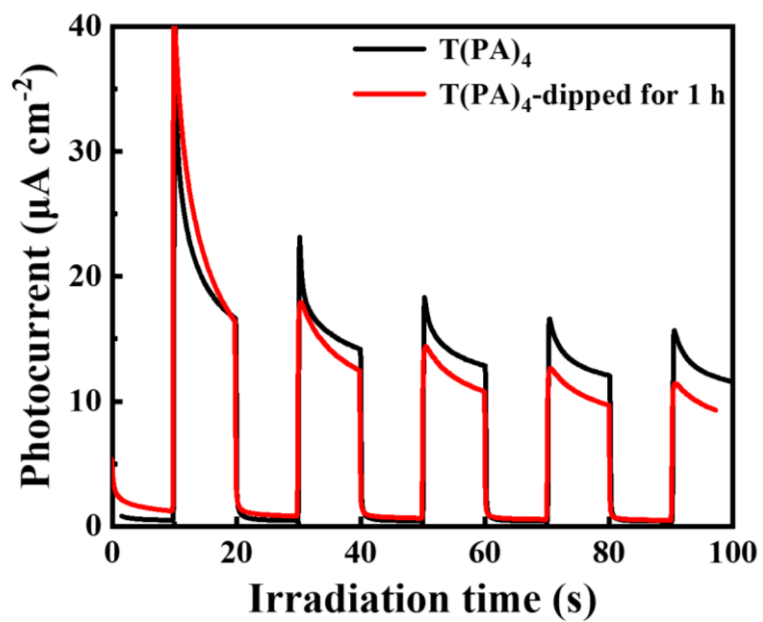

**Fig. S14.** Transient photocurrent responses of T(PA)<sub>4</sub> before and after dipping in Na<sub>2</sub>SO<sub>4</sub> aqueous solution (pH=6.69) for 1 h under visible light ( $\lambda > 420$  nm) irradiation (bias: 1.0 V vs. RHE).

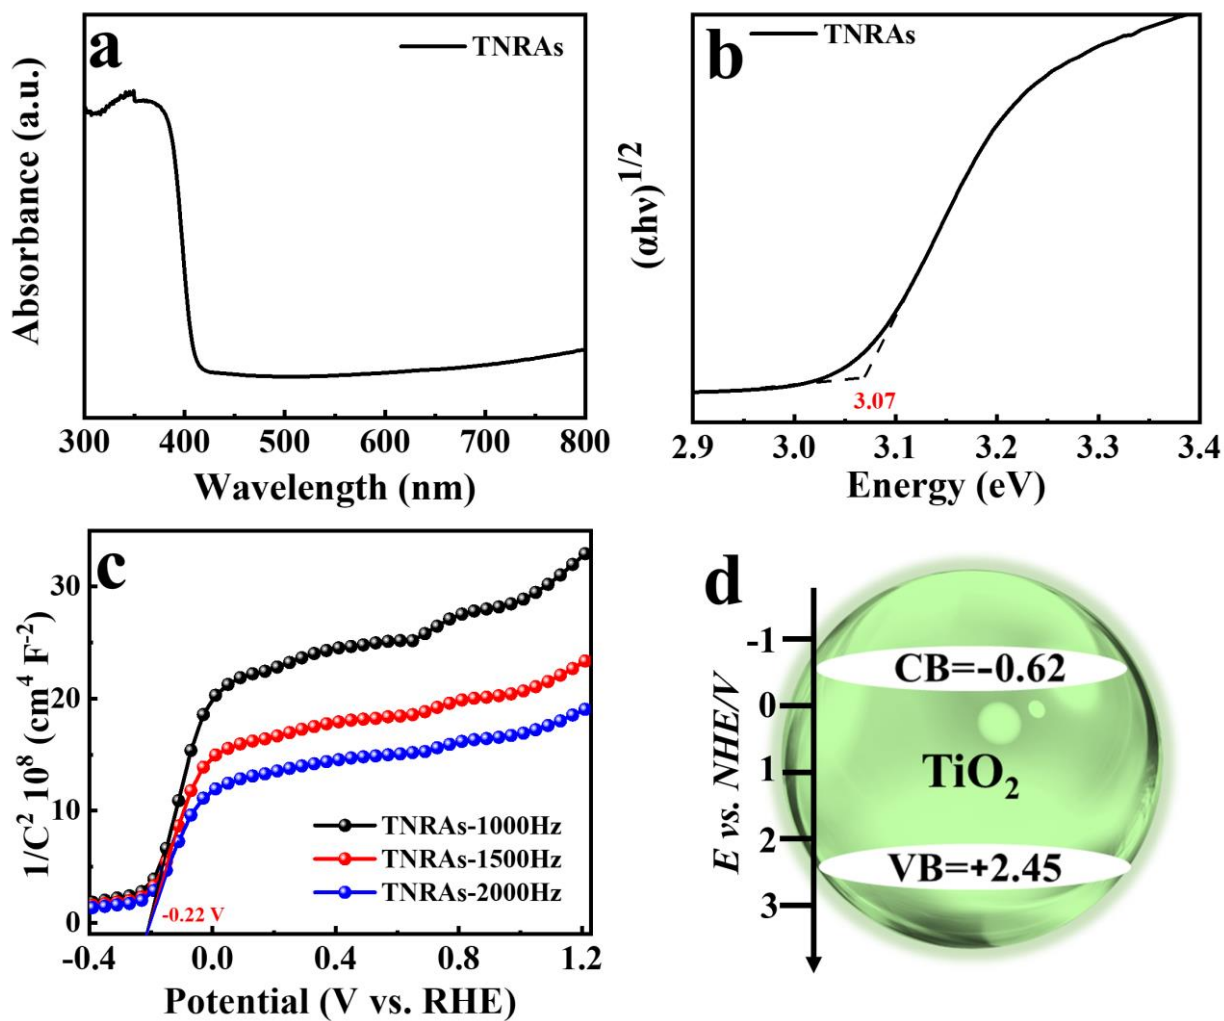

**Fig. S15.** (a) DRS results with corresponding (b) bandgap determination, (c) Mott-Schottky plots and (d) energy band structure of TNRAs substrate.

**Table S1.** Peak position with corresponding functional groups for all photoanodes.

| <i>Peak position (cm<sup>-1</sup>)</i>     | <i>TNRAs</i>           | <i>TP<sub>4</sub></i>                      | <i>TA<sub>4</sub></i>                                           | <i>T(PA)<sub>4</sub></i>                                        |
|--------------------------------------------|------------------------|--------------------------------------------|-----------------------------------------------------------------|-----------------------------------------------------------------|
| <b>3463</b> <sup>S3</sup>                  | VO-H                   | VO-H, VN-H                                 | VO-H, VN-H                                                      | VO-H, VN-H                                                      |
| <b>2975&amp;2913</b> <sup>S4</sup>         | Not Detected           | VC-H                                       | VC-H                                                            | VC-H                                                            |
| <b>1111</b>                                | Not Detected           | VC-N                                       | VC-N                                                            | VC-N                                                            |
| <b>1633</b> <sup>S3, S5</sup>              | $\delta_{\text{O-H}}$  | $\delta_{\text{O-H}}, \delta_{\text{N-H}}$ | $\delta_{\text{O-H}}, \delta_{\text{N-H}}, \delta_{\text{C=O}}$ | $\delta_{\text{O-H}}, \delta_{\text{N-H}}, \delta_{\text{C=O}}$ |
| <b>653, 640, 638&amp;615</b> <sup>S6</sup> | $\delta_{\text{Ti-O}}$ | $\delta_{\text{Ti-O}}$                     | $\delta_{\text{Ti-O}}$                                          | $\delta_{\text{Ti-O}}$                                          |

**Table S2.** Chemical bond species for different photoelectrodes.

| <i>Element</i>             | <i>TNRAs (eV)</i> | <i>T(PA)<sub>4</sub> (eV)</i> | <i>Chemical Bond Specie</i>                  |
|----------------------------|-------------------|-------------------------------|----------------------------------------------|
| <b>C 1s a</b>              | 284.80            | 284.80                        | C-C/C-H                                      |
| <b>C 1s b</b>              | 286.32            | 286.16                        | C-OH <sup>S7</sup>                           |
| <b>C 1s a</b>              | Not Detected      | 287.92                        | -COOH <sup>S7</sup>                          |
| <b>Ti 2p<sub>1/2</sub></b> | 463.00            | 462.76                        | Monoclinic (Ti <sup>4+</sup> ) <sup>S6</sup> |
| <b>Ti 2p<sub>3/2</sub></b> | 457.30            | 457.06                        | Monoclinic (Ti <sup>4+</sup> ) <sup>S6</sup> |
| <b>O 1s a</b>              | 528.60            | 528.25                        | Lattice Oxygen <sup>S6</sup>                 |
| <b>O 1s b</b>              | 531.16            | 530.72                        | Ti-OH <sup>S8</sup>                          |
| <b>N 1s a</b>              | Not Detected      | 399.69                        | -NH <sub>2</sub> /-NH- <sup>S8</sup>         |
| <b>N 1s b</b>              | Not Detected      | 402.48                        | NH <sub>4</sub> <sup>+</sup> <sup>S8</sup>   |
| <b>Ag 3d<sub>3/2</sub></b> | Not Detected      | 367.92                        | Ag <sup>0</sup> <sup>S9, S10</sup>           |
| <b>Ag 3d<sub>3/2</sub></b> | Not Detected      | 368.32                        | Ag <sup>+</sup> <sup>S9, S10</sup>           |
| <b>Ag 3d<sub>5/2</sub></b> | Not Detected      | 373.92                        | Ag <sup>0</sup> <sup>S9, S10</sup>           |
| <b>Ag 3d<sub>5/2</sub></b> | Not Detected      | 374.24                        | Ag <sup>+</sup> <sup>S9, S10</sup>           |

**Table S3.** Fitted EIS results of photoanodes under visible-light irradiation based on the equivalent circuit.

| <i>Photoanode</i>        | <i>R<sub>s</sub>/ohm</i> | <i>R<sub>ct</sub>/ohm</i> | <i>CPE/(F cm<sup>-2</sup>)</i> | <i>Z<sub>w</sub></i> |
|--------------------------|--------------------------|---------------------------|--------------------------------|----------------------|
| <b>T(PA)<sub>4</sub></b> | 27.44                    | 4098                      | 0.00005645                     | 0.0007106            |
| <b>TA<sub>4</sub></b>    | 8.929                    | 6581                      | 0.000166                       | 0.001564             |
| <b>TP<sub>4</sub></b>    | 8.835                    | 10970                     | 0.0001343                      | 0.001081             |
| <b>TNRAs</b>             | 11.21                    | 12480                     | 0.0001246                      | 0.0009721            |

**Note:** T(PA)<sub>4</sub> demonstrates the smallest R<sub>ct</sub> in comparison with other counterparts under visible light irradiation ( $\lambda > 420$  nm), indicative of its lowest interfacial charge transfer resistance.

**Table S4.** HOMO, LUMO levels and bandgap of Ag<sub>x</sub>@GSH, Ag<sub>9</sub>(SG)<sub>6</sub>, Ag<sub>16</sub>(SG)<sub>9</sub> and Ag<sub>31</sub>(SG)<sub>19</sub>NCs.

| <i>Metal NCs</i>                        | <i>HOMO (V vs. NHE)</i> | <i>LUMO (V vs. NHE)</i> | <i>Bandgap (eV)</i> |
|-----------------------------------------|-------------------------|-------------------------|---------------------|
| Ag <sub>x</sub> @GSH NCs                | 1.45                    | -1.09                   | 2.54                |
| Ag <sub>9</sub> (SG) <sub>6</sub> NCs   | 0.83                    | -1.76                   | 2.59                |
| Ag <sub>16</sub> (SG) <sub>9</sub> NCs  | 0.78                    | -1.8                    | 2.58                |
| Ag <sub>31</sub> (SG) <sub>19</sub> NCs | 1.0                     | -1.53                   | 2.53                |

## References

- S1. X. Yuan, M. I. Setyawati, A. S. Tan, C. N. Ong, D. T. Leong and J. Xie, *Npg Asia Mater.*, 2013, **5**, e39.
- S2. F. Bertorelle, R. Hamouda, D. Rayane, M. Broyer, R. Antoine, P. Dugourd, L. Gell, A. Kulesza, R. Mitrić and V. Bonačić-Koutecký, *Nanoscale*, 2013, **5**, 5637-5643.
- S3. N. A. Kotov, I. D & aacute;ny and J. H. Fendler, *Adv. Mater.*, 1996, **8**, 637-641.
- S4. Q. Zhang, Q. An, X. Luan, H. Huang, X. Li, Z. Meng, W. Tong, X. Chen, P. K. Chu and Y. Zhang, *Nanoscale*, 2015, **7**, 14002-14009.
- S5. Z. Zeng, T. Li, Y.-B. Li, X.-C. Dai, M.-H. Huang, Y. He, G. Xiao and F.-X. Xiao, *J. Mater. Chem. A*, 2018, **6**, 24686-24692.
- S6. H. Cheng, J. Ma, Z. Zhao and L. Qi, *Chem. Mater.*, 1995, **7**, 663-671.
- S7. F. X. Xiao, Z. P. Zeng and B. Liu, *J. Am. Chem. Soc.*, 2015, **137**, 10735-10744.
- S8. C. S. Mo, J. H. Jian, J. Li, Z. S. Fang, Z. Zhao, Z. K. Yuan, M. J. Yang, Y. Zhang, L. M. Dai and D. S. Yu, *Energy Environ. Sci.*, 2018, **11**, 3334-3341.
- S9. X. Chen, H. Gu, L. Qin, S.-Z. Kang and X. Li, *Materials & Design*, 2020, **191**, 108609.
- S10. M. A. Abbas, S. J. Yoon, H. Kim, J. Lee, P. V. Kamat and J. H. Bang, *ACS Appl. Mater. Inter.*, 2019, **11**, 12492-12503.
